# Supplementary material
Source: HighWire-hosted journal article supplement (https://bmjopen.bmj.com/content/14/12/e085431)
Supplement: inline-supplementary-material-1 [file inline-supplementary-material-1.pdf]

Table S1 Mobile Outpatient Specialist Appointment Registration Procedure for patients and specialists

| Steps | Procedure for patients                                                                                                                                                                                                                                                                                 |
|-------|--------------------------------------------------------------------------------------------------------------------------------------------------------------------------------------------------------------------------------------------------------------------------------------------------------|
| 1     | The patient registers on the WeChat official medical service account of Renji Hospital using a mobile phone.                                                                                                                                                                                           |
| 2     | The patient reads the online specialist directory of the hospital and the diseases in which the specialist specializes.                                                                                                                                                                                |
| 3     | The patient selects a specific specialist and requests an appointment by accessing the "Precise Reservation Path (PRP)" label.                                                                                                                                                                         |
| 4     | The patient confirms the informed consent of the PRP, protocol, and submission of medical records.                                                                                                                                                                                                     |
| 5     | According to the requirements of different specialist protocols, the patient also needs to submit relevant past examination reports (no earlier than 3 months), such as blood laboratory tests, ultrasound rays, computed tomography (CT), magnetic resonance imaging (MRI), and pathological reports. |
| 6     | If approval is received from the specialist users, the patient is allowed to visit the specialist offline on the appointed day.                                                                                                                                                                        |
| Steps | Procedure for specialists                                                                                                                                                                                                                                                                              |
| 1     | The specialist team user registers on the official WeChat accounts of Renji Hospital to build a PRP account using a mobile phone and obtains approval from the PRP system administrator.                                                                                                               |
| 2     | The specialist team user completes their individual profile, including information about diseases in which they are specialized, past examination reports, and informed consent for patients before obtaining approval from the hospital's information administrator.                                  |
| 3     | The specialist team user responds to patients' requests in a timely manner.                                                                                                                                                                                                                            |
| 4     | A specialist team user approves or rejects the patient's application. In the event of rejection, the user provides specific advice, such as recommending a well-matched subspecialty for the patient or suggesting a referral to their general practitioner.                                           |

Table S2 The classifications and measures of variables of interest

| Variables                                    | How to measure                                                            | Type        |
|----------------------------------------------|---------------------------------------------------------------------------|-------------|
| Whether having Passed the Review             | 1=Yes; 0= No                                                              | Categorical |
| Age                                          | 1=18-34 years;<br>2=35-59 years;<br>3=60-74 years;<br>4=75 years or above | Categorical |
| Gender                                       | 1=Male ;0=Female                                                          | Categorical |
| If having a Preference to pay with Insurance | 1=Yes; 0=No                                                               | Categorical |
| Academic title of the specialist             | 1=Senior specialist;<br>2=Associate senior specialist                     | Categorical |
| Surgical department or not                   | 1=Yes; 0=No                                                               | Categorical |

Table S3 Operational Profile of 26 Departments participating in the PRP Program

| Clinic department                                           | Applicati<br>on count | Pass<br>rate(<br>%) | Patien<br>ts age<br>Medi<br>an | Patien<br>ts age<br>IQR | Patients<br>gender<br>ratio(male/fe<br>male) | Insuran<br>ce<br>patient<br>ratio<br>(%) | Patient<br>applicati<br>on count<br>for<br>senior<br>specialis<br>t | Patient<br>applicati<br>on count<br>for<br>associat<br>e senior<br>specialis<br>t | Senior<br>special<br>ist<br>applica<br>nt<br>ratio(<br>%) | PRP<br>progra<br>m<br>speciali<br>sts | Total<br>speciali<br>sts | PRP<br>specialists<br>proportion(<br>% ) | Average<br>specialist<br>applicati<br>ons |
|-------------------------------------------------------------|-----------------------|---------------------|--------------------------------|-------------------------|----------------------------------------------|------------------------------------------|---------------------------------------------------------------------|-----------------------------------------------------------------------------------|-----------------------------------------------------------|---------------------------------------|--------------------------|------------------------------------------|-------------------------------------------|
| Urinary Surgery                                             | 11142                 | 37.4*               | 64                             | 17                      | 3.85                                         | 71.6                                     | 2012                                                                | 9130                                                                              | 18.1                                                      | 14                                    | 37                       | 38                                       | 795.9                                     |
| Breast Surgery                                              | 10097                 | 18.3                | 44                             | 20                      | 0.01                                         | 74.4                                     | 6397                                                                | 3700                                                                              | 63.4                                                      | 5                                     | 5                        | 100                                      | 2019.4                                    |
| Thoracic Surgery                                            | 9332                  | 27.7                | 56                             | 22                      | 0.57                                         | 65.0                                     | 9332                                                                | 0                                                                                 | 100.0                                                     | 1                                     | 6                        | 17                                       | 9332.0                                    |
| Obstetrics And<br>Gynecology                                | 4862                  | 44.8*               | 39                             | 19                      | 0                                            | 76.3                                     | 3432                                                                | 1430                                                                              | 70.6                                                      | 4                                     | 35                       | 11                                       | 1215.5                                    |
| Gastrointestinal Surgery                                    | 4716                  | 38.6*               | 59                             | 26                      | 1.37                                         | 71.2                                     | 2364                                                                | 2352                                                                              | 50.1                                                      | 6                                     | 29                       | 21                                       | 786.0                                     |
| Nephrology                                                  | 4011                  | 42.0*               | 57                             | 28                      | 0.93                                         | 82.8                                     | 1955                                                                | 2056                                                                              | 48.7                                                      | 6                                     | 17                       | 35                                       | 668.5                                     |
| Head And Neck Surgery,<br>Biliary And Pancreatic<br>Surgery | 3256                  | 52.7*<br>47.3<br>*  | 49                             | 22                      | 0.31                                         | 77.7                                     | 126                                                                 | 3130                                                                              | 3.9                                                       | 2                                     | 5                        | 40                                       | 1628.0                                    |
| Radiotherapy                                                | 3076                  | 55.1*               | 59                             | 25                      | 0.83                                         | 77.0                                     | 1601                                                                | 1475                                                                              | 52.1                                                      | 12                                    | 25                       | 48                                       | 256.3                                     |
| Traumatic Orthopedics                                       | 1551                  | 36.8*               | 61                             | 19                      | 1.14                                         | 61.5                                     | 1261                                                                | 290                                                                               | 81.3                                                      | 3                                     | 7                        | 43                                       | 517.0                                     |
| Vascular Surgery                                            | 1406                  | 26.1                | 44                             | 32                      | 0.89                                         | 76.4                                     | 0                                                                   | 1406                                                                              | 0.0                                                       | 1                                     | 10                       | 10                                       | 1406.0                                    |
| Rheumatology And<br>Immunology                              | 835                   | 2.2                 | 47                             | 24                      | 0.3                                          | 40.0                                     | 720                                                                 | 70                                                                                | 91.1                                                      | 4                                     | 9                        | 44                                       | 208.8                                     |
| Cardiology                                                  | 790                   | 17.1                | 61                             | 27                      | 0.81                                         | 80.1                                     | 206                                                                 | 486                                                                               | 29.8                                                      | 3                                     | 20                       | 15                                       | 263.3                                     |
| Joint Surgery                                               | 692                   | 44.3*               | 55                             | 27                      | 0.56                                         | 72.3                                     | 421                                                                 | 62                                                                                | 87.2                                                      | 4                                     | 25                       | 16                                       | 173.0                                     |
| Gynecological Oncology                                      | 483                   | 61.5*               | 47                             | 20                      | 0                                            | 55.0                                     | 454                                                                 | 24                                                                                | 95.0                                                      | 2                                     | 3                        | 67                                       | 120.8                                     |
|                                                             | 478                   |                     |                                |                         |                                              |                                          |                                                                     |                                                                                   |                                                           |                                       |                          |                                          | 239.0                                     |

|                      |       |       |    |    |      |       |       |       |       |    |     |        |       |
|----------------------|-------|-------|----|----|------|-------|-------|-------|-------|----|-----|--------|-------|
| Otorhinolaryngology  | 470   | 33.4  | 47 | 25 | 1.02 | 77.0  | 143   | 327   | 30.4  | 4  | 8   | 50     | 117.5 |
| Spine Surgery        |       | 56.4  |    |    |      |       |       |       |       |    |     |        |       |
|                      | 445   | *     | 66 | 24 | 0.79 | 79.8  | 445   | 0     | 100.0 | 1  | 9   | 11     | 445.0 |
| Ophthalmology        |       | 43.5  |    |    |      |       |       |       |       |    |     |        |       |
|                      | 237   | *     | 64 | 27 | 0.72 | 72.6  | 0     | 237   | 0.0   | 1  | 12  | 8      | 237.0 |
| Pain Medicine        | 143   | 40.6* | 60 | 27 | 0.72 | 60.1  | 0     | 143   | 0.0   | 1  | 2   | 50     | 143.0 |
| Functional Neurology | 120   | 0.0   | 44 | 30 | 1.03 | 59.2  | 0     | 120   | 0.0   | 1  | 1   | 100    | 120.0 |
| Oncology             | 49    | 51.0* | 60 | 19 | 0.96 | 32.7  | 49    | 0     | 100.0 | 1  | 12  | 8      | 49.0  |
| Plastic Surgery      | 25    | 28.0  | 41 | 18 | 1.27 | 84.0  | 0     | 25    | 0.0   | 1  | 5   | 20     | 25.0  |
| Digestion Medicine   | 21    | 0.0   | 52 | 20 | 0.91 | 38.1  | 21    | 0     | 100.0 | 1  | 44  | 2      | 21.0  |
| Diagnostic Radiology | 18    | 55.6* | 64 | 50 | 0.38 | 27.8  | 0     | 18    | 0.0   | 1  | 16  | 6      | 18.0  |
| Endocrinology        | 13    | 0.0   | 41 | 20 | 1.17 | 53.9  | 13    | 0     | 100.0 | 1  | 10  | 10     | 13.0  |
| General Surgery      | 3     | 0.0   | 34 | /  | 0    | 100.0 | 3     | 0     | 100.0 | 1  | 8   | 13     | 3.0   |
| Total                | 58271 | 34.8  | 54 | 26 | 0.63 | 72.2  | 31560 | 26711 | 54.2  | 85 | 369 | 23.04% | 685.5 |

Note:

- Patients age Median: Median age of patients applying
- Patients age IQR: Age IQR of patients applying
- Patients gender ratio: Gender ratio of patients applying(male/female)
- Insurance patient ratio (%): Proportion of insurance among the patients applying
- Senior specialist applicant Ratio(%): Proportion of patient apply for senior specialist among all applicants
- PRP program specialists: Number of specialists participating in PRP program
- Total specialists: Total number of specialists in department
- PRP specialists proportion(% ):Proportion of specialists participating in the PRP program to the total number of specialists in department
- Average specialist applications: Average of patients applying for one specialist in department

Tabe S4 The Role in Random Forest Model and Result of Predictor Importance

| Variables                         | Role in random forest model | Predictor importance |
|-----------------------------------|-----------------------------|----------------------|
| Patients age Median               | input                       | 0.93                 |
| PRP specialists proportion        | input                       | 0.87                 |
| Average specialist applications   | input                       | 0.84                 |
| Total specialists                 | input                       | 0.53                 |
| Insurance patient ratio           | input                       | 0.35                 |
| PRP program specialists           | input                       | 0.35                 |
| Patients gender ratio             | input                       | 0.22                 |
| Application count                 | input                       | 0.16                 |
| Senior specialist applicant ratio | input                       | 0.12                 |
| Pass Rate Interval                | target                      | /                    |

Tabe S5 The Role in ANN Model and Result of Predictor Importance

| Variables                       | Role in ANN model | Predictor importance |
|---------------------------------|-------------------|----------------------|
| Specialist                      | input             | 0.44                 |
| Clinic department               | input             | 0.43                 |
| Patient age group               | input             | 0.07                 |
| Acdemic title of the specialist | input             | 0.04                 |
| Gender                          | input             | 0.02                 |
| Assessment result(yes or no)    | target            | /                    |

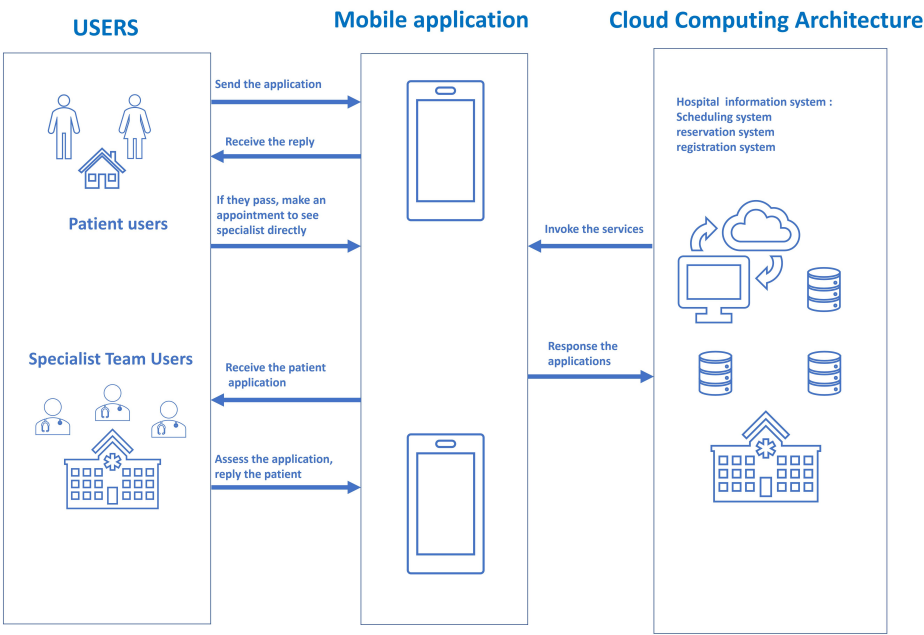

Figure S1. The PRP model architecture

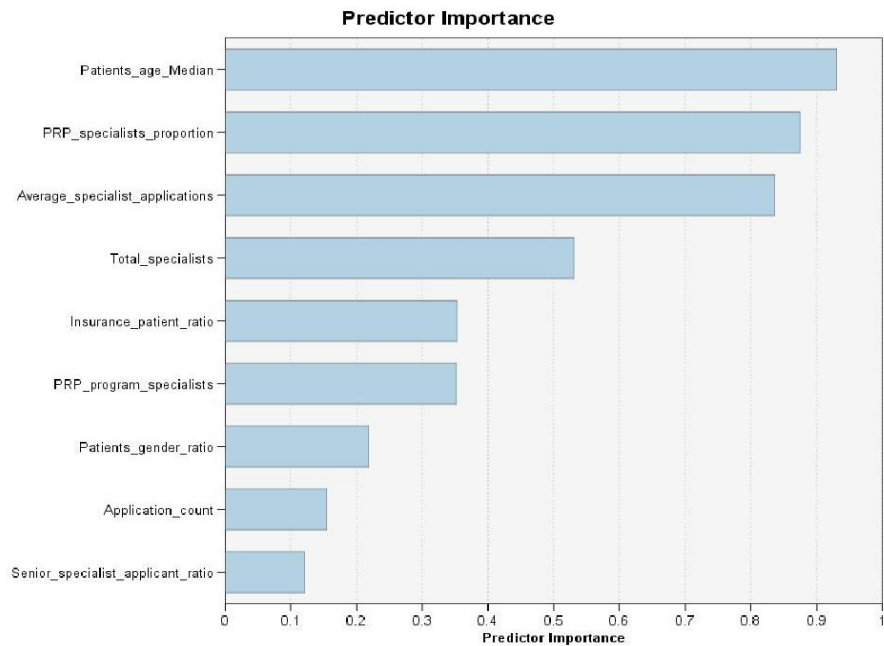

Figure S2. Result of Predictor Importance Through RF Analysis
